# Supplementary material for: Development and application of simulation modelling for orthopaedic elective resource planning in England
Source: HighWire-hosted journal article supplement (doi:10.1136/bmjopen-2023-076221), 2023-12-01
Supplement: bmjopen-2023-076221supp002_data_supplement.pdf [file bmjopen-2023-076221supp002_data_supplement.pdf]

## Supplementary Material 2

Table S1: OPCS-4 codes used to identify hip and knee arthroplasty surgery

| PRIMARY TOTAL HIP REPLACEMENT |                                                                                     |  |
|-------------------------------|-------------------------------------------------------------------------------------|--|
|                               |                                                                                     |  |
| <u>4 Character Code</u>       | <u>Description</u>                                                                  |  |
| W37.1                         | Primary total prosthetic replacement of hip joint using cement                      |  |
| W37.8                         | Other specified total prosthetic replacement of hip joint using cement              |  |
| W37.9                         | Unspecified total prosthetic replacement of hip joint using cement                  |  |
| W38.1                         | Primary total prosthetic replacement of hip joint not using cement                  |  |
| W38.8                         | Other specified total prosthetic replacement of hip joint not using cement          |  |
| W38.9                         | Unspecified total prosthetic replacement of hip joint not using cement              |  |
| W39.1                         | Primary total prosthetic replacement of hip joint NEC                               |  |
| W39.8                         | Other specified other total prosthetic replacement of hip joint                     |  |
| W39.9                         | Unspecified other total prosthetic replacement of hip joint                         |  |
| W43.1                         | Primary total prosthetic replacement of other joint using cement NEC                |  |
| W43.8                         | Other specified total prosthetic replacement of other joint using cement NEC        |  |
| W43.9                         | Unspecified total prosthetic replacement of other joint using cement NEC            |  |
| W44.1                         | Primary total prosthetic replacement of other joint not using cement NEC            |  |
| W44.8                         | Other specified total prosthetic replacement of other joint not using cement NEC    |  |
| W44.9                         | Unspecified total prosthetic replacement of other joint not using cement NEC        |  |
| W45.1                         | Other primary total prosthetic replacement of other joint NEC                       |  |
| W45.8                         | Other specified total prosthetic replacement of other joint NEC                     |  |
| W45.9                         | Unspecified total prosthetic replacement of other joint NEC                         |  |
| W52.1                         | Primary prosthetic replacement of articulation of bone using cement NEC             |  |
| W52.8                         | Other specified prosthetic replacement of articulation of bone using cement NEC     |  |
| W52.9                         | Unspecified prosthetic replacement of articulation of bone using cement NEC         |  |
| W53.1                         | Primary prosthetic replacement of articulation of bone not using cement NEC         |  |
| W53.8                         | Other specified prosthetic replacement of articulation of bone not using cement NEC |  |

|                                     |                                                                                                |  |
|-------------------------------------|------------------------------------------------------------------------------------------------|--|
| W53.9                               | Unspecified prosthetic replacement of articulation of bone not using cement NEC                |  |
| W54.1                               | Primary prosthetic replacement of articulation of bone NEC                                     |  |
| W54.8                               | Other specified prosthetic replacement of articulation of bone NEC                             |  |
| W54.9                               | Unspecified prosthetic replacement of articulation of bone NEC                                 |  |
| W93.1                               | Primary hybrid prosthetic replacement of hip joint using cemented acetabular component         |  |
| W93.8                               | Other specified hybrid prosthetic replacement of hip joint using cemented acetabular component |  |
| W93.9                               | Unspecified hybrid prosthetic replacement of hip joint using cemented acetabular component     |  |
| W94.1                               | Primary hybrid prosthetic replacement of hip joint using cemented femoral component            |  |
| W94.8                               | Other specified hybrid prosthetic replacement of hip joint using cemented femoral component    |  |
| W94.9                               | Unspecified hybrid prosthetic replacement of hip joint using cemented femoral component        |  |
| W95.1                               | Primary hybrid prosthetic replacement of hip joint using cement NEC                            |  |
| W95.8                               | Other specified hybrid prosthetic replacement of hip joint using cement                        |  |
| W95.9                               | Unspecified hybrid prosthetic replacement of hip joint using cement                            |  |
|                                     |                                                                                                |  |
| <b>RESURFACING / RECONSTRUCTION</b> |                                                                                                |  |
|                                     |                                                                                                |  |
| <u>4 Character Code</u>             | <u>Description</u>                                                                             |  |
| W58.1                               | Primary resurfacing arthroplasty of joint                                                      |  |
| W58.8                               | Other specified reconstruction of joint                                                        |  |
| W58.9                               | Unspecified other reconstruction of joint                                                      |  |
|                                     |                                                                                                |  |
| <b>LOCATION OF SURGERY</b>          |                                                                                                |  |
|                                     |                                                                                                |  |
| <u>4 Character Code</u>             | <u>Description</u>                                                                             |  |
| Z75.6                               | Acetabulum                                                                                     |  |
| Z76.1                               | Head of femur                                                                                  |  |
| Z84.3                               | Hip joint                                                                                      |  |
|                                     |                                                                                                |  |
| <b>REVISION HIP REPLACEMENT</b>     |                                                                                                |  |
|                                     |                                                                                                |  |
| <u>4 Character Code</u>             | <u>Description</u>                                                                             |  |

|       |                                                                                         |             |
|-------|-----------------------------------------------------------------------------------------|-------------|
| W37.0 | Conversion from previous cemented total prosthetic replacement of hip joint             |             |
| W37.2 | Conversion to total prosthetic replacement of hip joint using cement                    |             |
| W37.3 | Revision of total prosthetic replacement of hip joint using cement                      |             |
| W37.4 | Revision of one component of total prosthetic replacement of hip joint using cement     |             |
| W38.0 | Conversion from previous uncemented total prosthetic replacement of hip joint           |             |
| W38.2 | Conversion to total prosthetic replacement of hip joint not using cement                |             |
| W38.3 | Revision of total prosthetic replacement of hip joint not using cement                  |             |
| W38.4 | Revision of one component of total prosthetic replacement of hip joint not using cement |             |
| W39.0 | Conversion from previous total prosthetic replacement of hip joint NEC                  |             |
| W39.2 | Conversion to total prosthetic replacement of hip joint NEC                             |             |
| W39.3 | Revision of total prosthetic replacement of hip joint NEC                               |             |
| W39.5 | Revision of one component of total prosthetic replacement of hip joint NEC              |             |
| W43.0 | Conversion from previous cemented total prosthetic replacement of joint NEC             | + Site code |
| W43.2 | Conversion to total prosthetic replacement of joint using cement NEC                    | + Site code |
| W43.3 | Revision of total prosthetic replacement of joint using cement NEC                      | + Site code |
| W43.4 | Revision of one component of total prosthetic replacement of joint using cement NEC     | + Site code |
| W44.0 | Conversion from previous uncemented total prosthetic replacement of joint NEC           | + Site code |
| W44.2 | Conversion to total prosthetic replacement of joint not using cement NEC                | + Site code |
| W44.3 | Revision of total prosthetic replacement of joint not using cement NEC                  | + Site code |
| W44.4 | Revision of one component of total prosthetic replacement of joint not using cement NEC | + Site code |
| W45.0 | Conversion from previous total prosthetic replacement of joint NEC                      | + Site code |
| W45.2 | Conversion to total prosthetic replacement of joint NEC                                 | + Site code |
| W45.3 | Revision of total prosthetic replacement of joint NEC                                   | + Site code |
| W45.5 | Revision of one component of total prosthetic replacement of joint NEC                  | + Site code |
| W46.2 | Conversion to prosthetic replacement of head of femur using cement                      |             |

|       |                                                                                                         |             |
|-------|---------------------------------------------------------------------------------------------------------|-------------|
| W46.3 | Revision of prosthetic replacement of head of femur using cement                                        |             |
| W47.2 | Conversion to prosthetic replacement of head of femur not using cement                                  |             |
| W47.3 | Revision of prosthetic replacement of head of femur not using cement                                    |             |
| W48.2 | Conversion to prosthetic replacement of head of femur NEC                                               |             |
| W48.3 | Revision of prosthetic replacement of head of femur NEC                                                 |             |
| W52.0 | Conversion from previous cemented prosthetic replacement of articulation of bone NEC                    | + Site code |
| W52.2 | Conversion to prosthetic replacement of articulation of bone using cement NEC                           | + Site code |
| W52.3 | Revision of prosthetic replacement of articulation of bone using cement NEC                             | + Site code |
| W53.0 | Conversion from previous uncemented prosthetic replacement of articulation of bone NEC                  | + Site code |
| W53.2 | Conversion to prosthetic replacement of articulation of bone not using cement NEC                       | + Site code |
| W53.3 | Revision of prosthetic replacement of articulation of bone not using cement NEC                         | + Site code |
| W54.0 | Conversion from previous prosthetic replacement of articulation of bone NEC                             | + Site code |
| W54.2 | Conversion to prosthetic replacement of articulation of bone NEC                                        | + Site code |
| W54.3 | Revision of prosthetic replacement of articulation of bone NEC                                          | + Site code |
| W57.4 | Conversion to excision arthroplasty of joint                                                            | + Site code |
| W58.0 | Conversion from previous resurfacing arthroplasty of joint                                              | + Site code |
| W58.2 | Revision of resurfacing arthroplasty of joint                                                           | + Site code |
| W93.0 | Conversion from previous hybrid prosthetic replacement of hip joint using cemented acetabular component |             |
| W93.2 | Conversion to hybrid prosthetic replacement of hip joint using cemented acetabular component            |             |
| W93.3 | Revision of hybrid prosthetic replacement of hip joint using cemented acetabular component              |             |
| W94.0 | Conversion from previous hybrid prosthetic replacement of hip joint using cemented femoral component    |             |
| W94.2 | Conversion to hybrid prosthetic replacement of hip joint using cemented femoral component               |             |
| W94.3 | Revision of hybrid prosthetic replacement of hip joint using cemented femoral component                 |             |
| W95.0 | Conversion from previous hybrid prosthetic replacement of hip joint using cement NEC                    |             |
| W95.2 | Conversion to hybrid prosthetic replacement of hip joint using cement NEC                               |             |
| W95.3 | Revision of hybrid prosthetic replacement of hip joint using cement NEC                                 |             |

|                                                               |                                                                                   |                                                         |
|---------------------------------------------------------------|-----------------------------------------------------------------------------------|---------------------------------------------------------|
| <b>PRIMARY TOTAL KNEE REPLACEMENT</b>                         |                                                                                   |                                                         |
|                                                               |                                                                                   |                                                         |
| <u>4 Character Code</u>                                       | <u>Description</u>                                                                |                                                         |
| W40.1                                                         | Primary total prosthetic replacement of knee joint using cement                   |                                                         |
| W40.8                                                         | Other specified total prosthetic replacement of knee joint using cement           |                                                         |
| W40.9                                                         | Unspecified total prosthetic replacement of knee joint using cement               |                                                         |
| W41.1                                                         | Primary total prosthetic replacement of knee joint not using cement               |                                                         |
| W41.8                                                         | Other specified total prosthetic replacement of knee joint not using cement       |                                                         |
| W41.9                                                         | Unspecified total prosthetic replacement of knee joint not using cement           |                                                         |
| W42.1                                                         | Primary total prosthetic replacement of knee joint NEC                            |                                                         |
| W42.8                                                         | Other specified other total prosthetic replacement of knee joint                  |                                                         |
| W42.9                                                         | Unspecified other total prosthetic replacement of knee joint                      |                                                         |
| O18.1                                                         | Primary hybrid prosthetic replacement of knee joint using cement                  |                                                         |
| O18.8                                                         | Other specified hybrid prosthetic replacement of knee joint using cement          |                                                         |
| O18.9                                                         | Unspecified hybrid prosthetic replacement of knee joint using cement              |                                                         |
|                                                               |                                                                                   |                                                         |
|                                                               |                                                                                   |                                                         |
|                                                               |                                                                                   |                                                         |
| <b>PRIMARY UNICONDYLAR / UNICOMPARTMENTAL KNEE OPERATIONS</b> |                                                                                   |                                                         |
|                                                               |                                                                                   |                                                         |
| <u>4 Character Code</u>                                       | <u>Description</u>                                                                |                                                         |
| W52.1                                                         | Primary prosthetic replacement of articulation of bone using cement NEC           | Require combination with site + combination codes to ID |
| W52.8                                                         | Other specified prosthetic replacement of articulation of other bone using cement | Require combination with site + combination codes to ID |

|                                  |                                                                                   |                                                                         |
|----------------------------------|-----------------------------------------------------------------------------------|-------------------------------------------------------------------------|
| W52.9                            | Unspecified prosthetic replacement of articulation of other bone using cement     | Require combination with site + combination codes to ID                 |
| W53.1                            | Primary prosthetic replacement of articulation of bone not using cement NEC       | Require combination with site + combination codes to ID                 |
| W53.9                            | Unspecified prosthetic replacement of articulation of other bone not using cement | Require combination with site + combination codes to ID                 |
| W54.0                            | Conversion from previous prosthetic replacement of articulation of bone NEC       | Require combination with site + combination codes to ID                 |
| W54.1                            | Primary prosthetic replacement of articulation of bone NEC                        | Require combination with site + combination codes to ID                 |
| W54.8                            | Other specified other prosthetic replacement of articulation of other bone        | Require combination with site + combination codes to ID                 |
| W54.9                            | Unspecified other prosthetic replacement of articulation of other bone            | Require combination with site + combination codes to ID                 |
| W58.1                            | Primary resurfacing arthroplasty of joint                                         | Require combination with site + combination codes to ID                 |
|                                  |                                                                                   |                                                                         |
| <b>SITE OF SURGERY</b>           |                                                                                   |                                                                         |
| Z76.5                            | Lower end of femur NEC                                                            |                                                                         |
| Z77.4                            | Upper end of tibia NEC                                                            |                                                                         |
| Z78.7                            | Patella                                                                           | Will need care in extracting as PFJ replacement will be coded with this |
| Z84.4                            | Patellofemoral joint                                                              | Will need care in extracting as PFJ replacement will be coded with this |
| Z84.5                            | Tibiofemoral joint                                                                |                                                                         |
| Z84.6                            | Knee joint                                                                        |                                                                         |
|                                  |                                                                                   |                                                                         |
| <b>REVISION KNEE REPLACEMENT</b> |                                                                                   |                                                                         |
|                                  |                                                                                   |                                                                         |
| <u>4 Character Code</u>          | <u>Description</u>                                                                |                                                                         |
| W40.0                            | Conversion from previous cemented total prosthetic replacement of knee joint      |                                                                         |

|       |                                                                                          |                                                                                                 |
|-------|------------------------------------------------------------------------------------------|-------------------------------------------------------------------------------------------------|
| W40.2 | Conversion to total prosthetic replacement of knee joint using cement                    |                                                                                                 |
| W40.3 | Revision of total prosthetic replacement of knee joint using cement                      |                                                                                                 |
| W40.4 | Revision of one component of total prosthetic replacement of knee joint using cement     |                                                                                                 |
| W41.0 | Conversion from previous uncemented total prosthetic replacement of knee joint           |                                                                                                 |
| W41.2 | Conversion to total prosthetic replacement of knee joint not using cement                |                                                                                                 |
| W41.3 | Revision of total prosthetic replacement of knee joint not using cement                  |                                                                                                 |
| W41.4 | Revision of one component of total prosthetic replacement of knee joint not using cement |                                                                                                 |
| W42.0 | Conversion from previous total prosthetic replacement of knee joint NEC                  |                                                                                                 |
| W42.2 | Conversion to total prosthetic replacement of knee joint NEC                             |                                                                                                 |
| W42.3 | Revision of total prosthetic replacement of knee joint NEC                               |                                                                                                 |
| W42.4 | Attention to total prosthetic replacement of knee joint NEC                              | Plus Y03.2 (Renewal of prosthesis in organ NOC) or Y03.7 (Removal of prosthesis from organ NOC) |
| W42.5 | Revision of one component of total prosthetic replacement of knee joint NEC              |                                                                                                 |
| W42.6 | Arthrolysis of total prosthetic replacement of knee joint                                |                                                                                                 |
| W58.0 | Conversion from previous resurfacing arthroplasty of joint                               |                                                                                                 |
| W58.2 | Revision of resurfacing arthroplasty of joint                                            | Require combination with site + combination codes to ID                                         |
| O18.0 | Conversion from previous hybrid prosthetic replacement of knee joint using cement        |                                                                                                 |
| O18.2 | Conversion to hybrid prosthetic replacement of knee joint using cement                   |                                                                                                 |
| O18.3 | Revision of hybrid prosthetic replacement of knee joint using cement                     |                                                                                                 |
| O18.4 | Attention to hybrid prosthetic replacement of knee joint using cement                    |                                                                                                 |
| W52.0 | Conversion from previous cemented prosthetic replacement of articulation of bone NEC     | Require combination with site + combination codes to ID                                         |
| W52.2 | Conversion to prosthetic replacement of articulation of bone using cement NEC            | Require combination with site + combination codes to ID                                         |

|       |                                                                                        |                                                         |
|-------|----------------------------------------------------------------------------------------|---------------------------------------------------------|
| W52.3 | Revision of prosthetic replacement of articulation of bone using cement NEC            | Require combination with site + combination codes to ID |
| W53.0 | Conversion from previous uncemented prosthetic replacement of articulation of bone NEC | Require combination with site + combination codes to ID |
| W53.2 | Conversion to prosthetic replacement of articulation of bone not using cement NEC      | Require combination with site + combination codes to ID |
| W53.3 | Revision of prosthetic replacement of articulation of bone not using cement NEC        | Require combination with site + combination codes to ID |
| W54.0 | Conversion from previous prosthetic replacement of articulation of bone NEC            | Require combination with site + combination codes to ID |
| W54.2 | Conversion to prosthetic replacement of articulation of bone NEC                       | Require combination with site + combination codes to ID |
| W54.3 | Revision of prosthetic replacement of articulation of bone NEC                         | Require combination with site + combination codes to ID |
| W54.4 | Attention to prosthetic replacement of articulation of bone NEC                        | Require combination with site + combination codes to ID |
| W55.3 | Conversion to prosthetic interposition arthroplasty of joint                           | Require combination with site + combination codes to ID |
| W56.4 | Conversion to interposition arthroplasty of joint NEC                                  | Require combination with site + combination codes to ID |
| W57.4 | Conversion to excision arthroplasty of joint                                           | Require combination with site + combination codes to ID |
| W60.3 | Conversion to arthrodesis and extra-articular bone graft NEC                           | Require combination with site + combination codes to ID |
| W61.3 | Conversion to arthrodesis and articular bone graft NEC                                 | Require combination with site + combination codes to ID |
| W64.1 | Conversion to arthrodesis and internal fixation NEC                                    | Require combination with site + combination codes to ID |
| W64.2 | Conversion to arthrodesis and external fixation NEC                                    | Require combination with site + combination codes to ID |
